# Supplementary material for: Prevalence and Potential Determinants of COVID-19 Vaccine Hesitancy and Resistance in Qatar: Results from a Nationally Representative Survey of Qatari Nationals and Migrants between December 2020 and January 2021
Source: Vaccines (Basel). 2021 May 7;9(5):471. doi: 10.3390/vaccines9050471 (PMC8151168; doi:10.3390/vaccines9050471)
Supplement: Supplementary file 1 [file vaccines-09-00471-s001.zip › Supplementary Table S1.pdf]

**Table S1: Models of the association between willingness to get COVID-19 vaccine and socio-demographics, work–and health-related characteristics**

| Variables                                                       | Ref                  | Unadjusted model |           |         |           |           |         | Reduced model |            |         |           |           |         | Fully adjusted model |             |         |           |             |         |
|-----------------------------------------------------------------|----------------------|------------------|-----------|---------|-----------|-----------|---------|---------------|------------|---------|-----------|-----------|---------|----------------------|-------------|---------|-----------|-------------|---------|
|                                                                 |                      | Hesitant         |           |         | Resistant |           |         | Hesitant      |            |         | Resistant |           |         | Hesitant             |             |         | Resistant |             |         |
|                                                                 |                      | RRR              | 95%CI     | p-value | RRR       | 95%CI     | p-value | RRR           | 95%CI      | p-value | RRR       | 95%CI     | p-value | RRR                  | 95%CI       | p-value | RRR       | 95%CI       | p-value |
| <b>Age group</b>                                                | 18-29                |                  |           |         |           |           |         |               |            |         |           |           |         |                      |             |         |           |             |         |
| 30-34                                                           |                      | 1.38             | 0.86-2.22 | 0.175   | 0.35      | 0.15-0.79 | 0.012   | 1.98          | 1.11-3.55  | 0.021   | 0.42      | 0.14-1.27 | 0.125   | 1.91                 | 1.03- 3.57  | 0.041   | 0.40      | 0.13- 1.27  | 0.119   |
| 35-39                                                           |                      | 0.92             | 0.57-1.46 | 0.711   | 0.54      | 0.28-1.04 | 0.065   | 1.22          | 0.71-2.11  | 0.476   | 0.62      | 0.27-1.41 | 0.256   | 1.13                 | 0.61- 2.08  | 0.696   | 0.53      | 0.21- 1.30  | 0.161   |
| 40+                                                             |                      | 0.77             | 0.52-1.15 | 0.199   | 0.59      | 0.33-1.03 | 0.063   | 0.86          | 0.53-1.40  | 0.557   | 0.58      | 0.29-1.17 | 0.129   | 0.82                 | 0.45- 1.48  | 0.515   | 0.46      | 0.20- 1.04  | 0.063   |
| <b>Gender</b>                                                   | Male                 |                  |           |         |           |           |         |               |            |         |           |           |         |                      |             |         |           |             |         |
| Female                                                          |                      | 2.15             | 1.57-2.96 | <0.0001 | 4.23      | 2.67-6.69 | <0.0001 | 1.52          | 1.00-2.30  | 0.051   | 3.58      | 1.83-7.04 | <0.0001 | 1.52                 | 1.00- 2.30  | 0.049   | 3.73      | 1.89- 7.34  | <0.0001 |
| <b>Migrant Status/Type</b>                                      | Qataris              |                  |           |         |           |           |         |               |            |         |           |           |         |                      |             |         |           |             |         |
| White-collar Migrants                                           | (non-Migrants)       | 0.54             | 0.35-0.84 | 0.06    | 0.18      | 0.10-0.30 | <0.0001 | 0.87          | 0.50-1.52  | 0.635   | 0.40      | 0.20-0.81 | 0.011   | 0.76                 | 0.43- 1.34  | 0.348   | 0.37      | 0.18- 0.76  | 0.006   |
| Blue-collar Migrants                                            |                      | 0.28             | 0.16-0.47 | <0.0001 | 0.11      | 0.05-0.25 | <0.0001 | 0.55          | 0.28-1.07  | 0.077   | 0.37      | 0.14-0.97 | 0.044   | 0.49                 | 0.25- 0.97  | 0.039   | 0.36      | 0.13- 1.00  | 0.050   |
| <b>Language</b>                                                 | English              |                  |           |         |           |           |         |               |            |         |           |           |         |                      |             |         |           |             |         |
| Arabic                                                          |                      | 3.21             | 2.40-4.31 | <0.0001 | 5.48      | 3.24-9.26 | <0.0001 | 3.10          | 2.11-5.56  | <0.0001 | 3.76      | 1.73-8.14 | 0.001   | 3.06                 | 2.08- 4.51  | <0.0001 | 3.83      | 1.72- 8.56  | 0.001   |
| <b>Education level</b>                                          | Undergrad or less    |                  |           |         |           |           |         |               |            |         |           |           |         |                      |             |         |           |             |         |
| Graduate/Prof                                                   |                      | 0.74             | 0.50-1.10 | 0.136   | 0.31      | 0.14-0.69 | 0.005   | 0.71          | 0.45-1.10  | 0.122   | 0.36      | 0.13-1.01 | 0.051   | 0.73                 | 0.47- 1.15  | 0.173   | 0.40      | 0.14- 1.15  | 0.090   |
| <b>Employment status</b>                                        | Unemployed           |                  |           |         |           |           |         |               |            |         |           |           |         |                      |             |         |           |             |         |
| Employed                                                        |                      | 0.48             | 0.34-0.68 | <0.0001 | 0.30      | 0.19-0.49 | <0.0001 | 0.86          | 0.54-1.37  | 0.537   | 1.28      | 0.63-2.59 | 0.488   | 0.86                 | 0.54- 1.37  | 0.523   | 1.25      | 0.62- 2.52  | 0.528   |
| <b>Marital status</b>                                           | Ever married         |                  |           |         |           |           |         |               |            |         |           |           |         |                      |             |         |           |             |         |
| Never married                                                   |                      | 0.92             | 0.65-1.30 | 0.640   | 0.93      | 0.55-1.58 | 0.783   | -             | -          | -       | -         | -         | -       | 0.87                 | 0.53- 1.44  | 0.599   | 0.83      | 0.41- 1.70  | 0.616   |
| <b>Living arrangement</b>                                       | Live with Others     |                  |           |         |           |           |         |               |            |         |           |           |         |                      |             |         |           |             |         |
| Live Alone                                                      |                      | 0.50             | 0.34-0.73 | <0.0001 | 0.48      | 0.24-0.95 | 0.035   | 0.68          | 0.43-1.08  | 0.104   | 1.18      | 0.53-2.64 | 0.682   | 0.69                 | 0.43- 1.10  | 0.116   | 1.20      | 0.53- 2.72  | 0.670   |
| <b>Depression or anxiety<sup>1</sup></b>                        | No                   |                  |           |         |           |           |         |               |            |         |           |           |         |                      |             |         |           |             |         |
| Yes                                                             |                      | 1.74             | 0.98-3.09 | 0.060   | 2.71      | 1.30-5.63 | 0.008   | 1.04          | 0.53-2.05  | 0.909   | 1.00      | 0.41-2.43 | 0.994   | 1.01                 | 0.51- 2.03  | 0.971   | 1.00      | 0.40- 2.51  | 0.996   |
| <b>Chronic disease<sup>2</sup></b>                              | No                   |                  |           |         |           |           |         |               |            |         |           |           |         |                      |             |         |           |             |         |
| Yes                                                             |                      | 0.90             | 0.65-1.24 | 0.520   | 1.45      | 0.91-2.31 | 0.119   | -             | -          | -       | -         | -         | -       | 0.80                 | 0.53- 1.20  | 0.272   | 1.17      | 0.63- 2.13  | 0.621   |
| <b>Quarantine status<sup>3</sup></b>                            | No                   |                  |           |         |           |           |         |               |            |         |           |           |         |                      |             |         |           |             |         |
| Yes                                                             |                      | 0.96             | 0.68-1.35 | 0.813   | 0.86      | 0.51-1.44 | 0.566   | -             | -          | -       | -         | -         | -       | 0.75                 | 0.48- 1.17  | 0.21    | 0.51      | 0.24- 1.09  | 0.081   |
| <b>COVID-19 Infection status<sup>4</sup></b>                    | No                   |                  |           |         |           |           |         |               |            |         |           |           |         |                      |             |         |           |             |         |
| Yes                                                             |                      | 0.99             | 0.59-1.66 | 0.975   | 1.24      | 0.60-2.54 | 0.563   | -             | -          | -       | -         | -         | -       | -                    | -           | -       | -         | -           | -       |
| <b>COVID-19 related death<sup>5</sup></b>                       | No                   |                  |           |         |           |           |         |               |            |         |           |           |         |                      |             |         |           |             |         |
| Yes                                                             |                      | 1.18             | 0.78-1.78 | 0.430   | 0.72      | 0.36-1.44 | 0.355   | -             | -          | -       | -         | -         | -       | 1.21                 | 0.75- 1.96  | 0.426   | 0.69      | 0.27- 1.75  | 0.435   |
| <b>COVID-19 Infection Concerns<sup>6</sup></b>                  | Not concerned at all |                  |           |         |           |           |         |               |            |         |           |           |         |                      |             |         |           |             |         |
| Somewhat/ Very concerned                                        |                      | 0.90             | 0.66-1.24 | 0.530   | 0.49      | 0.31-0.79 | 0.003   | 0.95          | 0.65-1.38  | 0.770   | 0.41      | 0.22-0.76 | 0.005   | 0.95                 | 0.65- 1.39  | 0.789   | 0.40      | 0.21- 0.75  | 0.004   |
| <b>COVID-19 vaccine side-effects are of concern<sup>7</sup></b> | Strongly disagree    |                  |           |         |           |           |         |               |            |         |           |           |         |                      |             |         |           |             |         |
| Somewhat agree or disagree/ Neutral                             |                      | 4.43             | 2.50-7.85 | <0.0001 | 0.19      | 0.09-0.42 | <0.0001 | 4.34          | 2.19-8.59  | <0.0001 | 0.28      | 0.10-0.80 | 0.017   | 4.50                 | 2.26- 8.93  | <0.0001 | 0.32      | 0.11- 0.91  | 0.033   |
| Strongly agree                                                  |                      | 5.46             | 3.01-9.90 | <0.0001 | 2.06      | 1.10-3.86 | 0.025   | 6.41          | 3.15-13.05 | <0.0001 | 3.66      | 1.47-9.08 | 0.005   | 6.76                 | 3.29- 13.86 | <0.0001 | 4.05      | 1.61- 10.16 | 0.003   |

Note. Ref. is reference category; CI is 95% confidence intervals. Univariable model regresses one potential exploratory variable on the dependent variable - willingness to take the vaccine. Reduced model adjusts for significant variables from the univariable models (n=851). Fully adjusted model adjusts for all variables (n=849) with the exception of COVID-19 status as it was collinear with infection concerns (concerns about oneself/others contracting COVID-19). Willingness to get the vaccine was categorized into: accept (strongly agree), hesitant (somewhat agree, neutral, somewhat disagree), and resistant (strongly disagree).

<sup>1</sup> defined as a cut-off of 10 or more on Physician Health Questionnaire (PHQ-9) or the Generalized Anxiety Disorder Questionnaire (GAD-7); <sup>2</sup>Chronic disease defined by respondents' endorsement of one of the following conditions: diabetes, high blood pressure, high cholesterol, asthma, heart disease, cancer or cancerous tumors, and disability (physical, visual, hearing); <sup>3</sup>defined as any experience of quarantine since the pandemic started <sup>4</sup>defined as positive if the respondent reported positive status confirmed by a test; <sup>5</sup>defined as death of someone close due to COVID-19; <sup>6</sup>measuring the extent of concern about themselves or their family members contracting COVID-19 (not-at-all concerned, not too concerned, somewhat concerned, very concerned); <sup>7</sup>defined as the degree of agreement/disagreement that "When a coronavirus vaccine becomes available, I will be concerned of its side effects"
