# Supplementary material for: Prevalence and Potential Determinants of COVID-19 Vaccine Hesitancy and Resistance in Qatar: Results from a Nationally Representative Survey of Qatari Nationals and Migrants between December 2020 and January 2021
Source: Vaccines (Basel). 2021 May 7;9(5):471. doi: 10.3390/vaccines9050471 (PMC8151168; doi:10.3390/vaccines9050471)
Supplement: Supplementary file 1 [file vaccines-09-00471-s001.zip › Supplementary Table S2.pdf]

**Supplement Table S2.** Willingness to get COVID-19 vaccine by socio-demographics, work-related, and health-related characteristics.

| Variables                                                       |                                    | Willingness to get the vaccine <sup>11</sup> (%) |          |           | p-value * |
|-----------------------------------------------------------------|------------------------------------|--------------------------------------------------|----------|-----------|-----------|
|                                                                 |                                    | Accept                                           | Hesitant | Resistant |           |
| <b>Migrant Status/Type</b>                                      | Qataris (non-migrants)             | 23.7                                             | 49.2     | 27.1      | <0.0001   |
|                                                                 | White-collar Migrants              | 42.9                                             | 48.3     | 8.8       |           |
|                                                                 | Blue-collar Migrants               | 58.5                                             | 33.8     | 7.7       |           |
| <b>Education level</b>                                          | Undergraduate or less              | 41.4                                             | 45.5     | 13.1      | 0.010     |
|                                                                 | Graduate/Professional              | 52.3                                             | 42.6     | 5.1       |           |
| <b>Gender</b>                                                   | Male                               | 50.0                                             | 41.9     | 50.0      | <0.0001   |
|                                                                 | Female                             | 28.6                                             | 51.6     | 28.6      |           |
| <b>Age group (years)</b>                                        | 18-29                              | 39.2                                             | 43.5     | 17.3      | 0.003     |
|                                                                 | 30-34                              | 37.1                                             | 57.1     | 5.7       |           |
|                                                                 | 35-39                              | 44.4                                             | 45.1     | 10.5      |           |
|                                                                 | 40+                                | 47.3                                             | 40.4     | 12.2      |           |
| <b>Marital status</b>                                           | Ever married                       | 42.2                                             | 45.6     | 12.2      | 0.889     |
|                                                                 | Never married                      | 44.1                                             | 44.0     | 11.9      |           |
| <b>Employment status</b>                                        | Unemployed                         | 28.1                                             | 52.7     | 19.3      | <0.0001   |
|                                                                 | Employed                           | 47.3                                             | 42.9     | 9.8       |           |
| <b>Ethnicity</b>                                                | Arab                               | 28.9                                             | 54.2     | 17.0      | <0.0001   |
|                                                                 | Non-Arab                           | 59.2                                             | 34.5     | 6.3       |           |
| <b>Living arrangement</b>                                       | Live with others                   | 39.8                                             | 47.5     | 12.8      | 0.001     |
|                                                                 | Live alone                         | 57.2                                             | 34.1     | 8.8       |           |
| <b>Depression or anxiety<sup>1</sup></b>                        | Yes                                | 28.9                                             | 51.0     | 20.1      | 0.018     |
|                                                                 | No                                 | 44.0                                             | 44.7     | 11.3      |           |
| <b>Chronic disease<sup>2</sup></b>                              | Yes                                | 42.7                                             | 41.6     | 15.8      | 0.125     |
|                                                                 | No                                 | 42.8                                             | 46.3     | 10.9      |           |
| <b>COVID-19 status<sup>3</sup></b>                              | Yes                                | 41.8                                             | 43.8     | 14.4      | 0.819     |
|                                                                 | No                                 | 42.8                                             | 45.3     | 11.9      |           |
| <b>COVID-19 related death<sup>4</sup></b>                       | Yes                                | 41.1                                             | 50.2     | 8.7       | 0.337     |
|                                                                 | No                                 | 43.0                                             | 44.5     | 12.6      |           |
| <b>Quarantine status<sup>5</sup></b>                            | Yes                                | 44.0                                             | 45.0     | 11.0      | 0.848     |
|                                                                 | No                                 | 42.4                                             | 45.2     | 12.4      |           |
| <b>COVID-19 infection concerns<sup>6</sup></b>                  | Not at all/not too concerned       | 38.9                                             | 44.5     | 16.6      | <0.0001   |
|                                                                 | Somewhat concerned                 | 35.2                                             | 54.8     | 10.0      |           |
|                                                                 | Very concerned                     | 53.4                                             | 37.8     | 8.8       |           |
| <b>Effective COVID-19 containment in Qatar<sup>7</sup></b>      | Strongly Agree                     | 46.3                                             | 42.5     | 11.2      | <0.0001   |
|                                                                 | Somewhat agree or disagree/Neutral | 26.1                                             | 57.4     | 16.5      |           |
| <b>COVID-19 vaccine side-effects are of concern<sup>8</sup></b> | Strongly agree                     | 32.5                                             | 46.1     | 21.5      | <0.0001   |
|                                                                 | Somewhat agree                     | 44.4                                             | 53.6     | 2.0       |           |
|                                                                 | Neutral                            | 42.1                                             | 51.8     | 6.0       |           |
|                                                                 | Somewhat disagree                  | 48.9                                             | 46.1     | 5.1       |           |
| <b>COVID-19 vaccine should be mandatory<sup>9</sup></b>         | Strongly disagree                  | 63.2                                             | 16.5     | 20.3      | <0.0001   |
|                                                                 | Strongly agree                     | 85.2                                             | 13.5     | 1.3       |           |
|                                                                 | Somewhat agree                     | 36.0                                             | 61.6     | 2.4       |           |
|                                                                 | Neutral                            | 22.9                                             | 71.3     | 5.8       |           |
|                                                                 | Somewhat disagree                  | 20.0                                             | 74.0     | 6.0       |           |
| <b>Endorsement source for vaccine<sup>10</sup></b>              | Strongly disagree                  | 7.3                                              | 46.7     | 46.0      | <0.0001   |
|                                                                 | My doctor                          | 50.4                                             | 43.1     | 6.5       |           |

|                           |      |      |      |
|---------------------------|------|------|------|
| Ministry of Health        | 55.8 | 41.7 | 2.6  |
| WHO                       | 50.1 | 44.5 | 5.4  |
| Positive feedback from    |      |      |      |
| Friends/family            | 33.1 | 60.2 | 6.7  |
| Scientific research       | 32.9 | 62.2 | 4.9  |
| Other                     | 38.7 | 43.7 | 17.6 |
| I will not accept vaccine | 1.0  | 25.8 | 73.3 |

---

Note. All reported percentages % are weighted. All rows add to 100%. \*Probabilities ( $p$ -values) were derived from design-based  $F$  tests, a weighted Pearson chi square statistic corrected for complex sampling design. The null hypothesis tests the assumption that there is no association between each explanatory variable with COVID-19 vaccine willingness groups. A test of  $p$ -value less than 0.05 would mean that the null hypothesis of independence between the explanatory variable and COVID-19 vaccine willingness groups could be rejected. The corresponding inference in this case would support evidence of statistical association between the explanatory variable and COVID-19 vaccine willingness groups.<sup>1</sup> defined as a cut-off of 10 or more on Physician Health Questionnaire (PHQ-9) or the Generalized Anxiety Disorder Questionnaire (GAD-7);<sup>2</sup>Chronic disease defined by respondents' endorsement of one of the following conditions: diabetes, high blood pressure, high cholesterol, asthma, heart disease, cancer or cancerous tumors, and disability (physical, visual, hearing);<sup>3</sup>defined as positive if the respondent reported positive status confirmed by a test;<sup>4</sup> defined as death of someone close due to COVID-19;<sup>5</sup>defined as any experience of quarantine since the pandemic started;<sup>6</sup> measuring the extent of concern about themselves or their family members contracting COVID-19 (not-at-all concerned, not to concerned, somewhat concerned, very concerned);<sup>7</sup> defined as the extent of agreement/disagreement that the measures taken in Qatar have been effective in controlling the spread of the virus;<sup>8</sup> defined as the degree of agreement/disagreement that "When a coronavirus vaccine becomes available, I will be concerned of its side effects";<sup>9</sup>defined as the degree of agreement/disagreement that "getting the coronavirus vaccine should be made mandatory";<sup>10</sup> based on the question "What would make you more confident in accepting the vaccine?" .
